# Supplementary material for: CD74 regulates complexity of tumor cell HLA class II peptidome in brain metastasis and is a positive prognostic marker for patient survival
Source: Acta Neuropathol Commun. 2018 Mar 1;6:18. doi: 10.1186/s40478-018-0521-5 (PMC5831742; doi:10.1186/s40478-018-0521-5)
Supplement: Supplementary file 4 — Table S1. Table showing differentially methylated CpGs between BM of NSCLC with a highly functional immune response, defined as CD74high and TILhigh tumors (CD74 TIL high) and tumors not showing both of these features (CD74 TIL low). (CSV 1 kb) [file 40478_2018_521_MOESM4_ESM.csv]

Column ID	UCSC_RefGene_Name
cg13300480	ROR1
cg06883317
cg02510381	DTNB
cg06568945	UBR5
cg03623968	RAB7A
cg02858512	SMG6
cg07183362
cg09059466	HLA-DPB1
cg09611279	TMEM135
cg05817709	RARRES3
cg07362060	LPIN1
cg15073759
cg16795263	LPIN1
cg25391492
cg24100293	FLJ22536
cg02533724
cg14830270	SMG6
cg23843597
cg16039157	B2M
cg03182645
cg10214492	HEXDC
cg15156941	ETFA
cg12839156
cg17008052	BRMS1
cg27144726	MAL
cg10764013	SLC20A2
cg02845988	UBE2N
cg27337217	SMG6
cg03135704	TRIM22
cg16442638
cg02087944	MMD
cg21623671	ANXA6
cg08992305	TRIM61
cg18213530	ANKRD46
cg21614855	SERPINA3
cg27176197	DDX28
cg03829973	LRP1
cg13393479
cg11581653	TSPAN17
cg06884199
cg06921803
cg07535790	ZBTB20
cg09628975	THTPA
cg00452806	E2F5
cg04596499	POLB
cg02982470	ZNF883
cg11705490
cg19269426	GGPS1
cg12439472	EPSTI1
cg10070940
cg16740213	GDA
cg19952385
cg16378835	PRPH
cg06010993	LOC101927143
cg17322443	FABP5L3
cg00232453	EHMT2
cg16678159	C11orf95
cg16306654	ACOT7
cg00622702	IFNAR1
cg05634697	CA13
cg05720159
cg20324858	UBE2Q1
cg18878242	RPL39L
cg06924277	TET1
cg00221794
cg15897624	CUX2
cg00669698
cg16687213	TRIM4
cg14127659	C22orf23
cg24537986	BTRC
cg06750875	TBC1D2B
cg21132839	CLMP
cg13494428	AKR7A2
cg01884891
